# Supplementary material for: Preparation of Assembled Carbon Soot Films and Hydrophobic Properties
Source: MDPI journal article supplement (doi:10.3390/ma11112318), 2018-11-19
Supplement: s1 [file s1]

Supplemental Information:

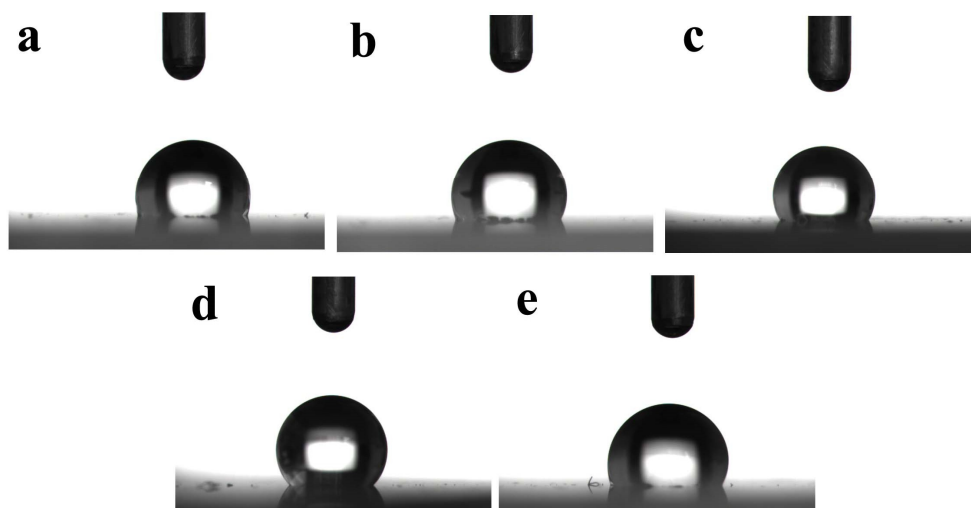

**Figure S1.** The CAs of CS films with different layers after placing in ambient environment for seven days: (a) the first-layer CS film; (b) the second-layer CS film; (c) the third-layer CS film; (d) the fourth-layer CS film; (e) the fifth-layer CS film.

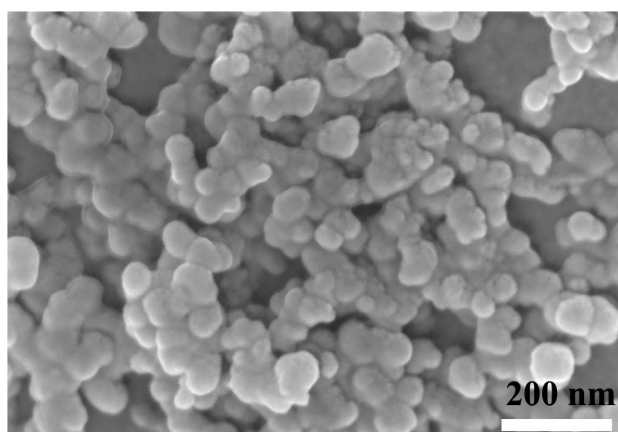

**Figure S2.** The high resolution picture of SEM of candle soot.
